# Supplementary material for: An unprecedented lanthanide phosphinidene halide: synthesis, structure and reactivity
Source: Royal Society of Chemistry journal article supplement (doi:10.1039/b813075b), 2008-01-01
Supplement: b813075b.pdf [file b813075b.pdf]

## **Supporting information**

### **An unprecedented lanthanide phosphinidene halide: synthesis, structure and reactivity**

Peng Cui, Yaofeng Chen,\* Xin Xu and Jie Sun

State Key Laboratory of Organometallic Chemistry, Shanghai Institute of Organic  
Chemistry, Chinese Academy of Sciences, 354 Fenglin Road, Shanghai 200032,  
China. Fax: 0085-21-64166128; E-mail: yaofchen@mail.sioc.ac.cn

## Experimental Section

**General Procedures.** All operations were carried out under an atmosphere of argon using standard Schlenk techniques or in a glovebox. THF was distilled from Na-benzophenone ketyl and degassed prior to use, toluene and hexane were dried over Na/K alloy. C<sub>6</sub>D<sub>6</sub> and THF-d<sub>8</sub> were dried over Na-K alloy, distilled under vacuum and stored in the glovebox. NdI<sub>3</sub>(THF)<sub>3.5</sub> was prepared from metal Nd and iodine in THF according to the standard procedure.<sup>1</sup> K[(2,6-*i*Pr)-C<sub>6</sub>H<sub>3</sub>PSi(CH<sub>3</sub>)<sub>3</sub>] was prepared from (2,6-*i*Pr)-C<sub>6</sub>H<sub>3</sub>PHSi(CH<sub>3</sub>)<sub>3</sub> and KH following the literature.<sup>2</sup> <sup>1</sup>H NMR, <sup>13</sup>C NMR and <sup>31</sup>P NMR spectra were recorded on a VARIAN Mercury 300 MHz spectrometer at 300 MHz, 75 MHz and 120MHz, respectively. All chemical shifts were reported in δ units with references to the residual solvent resonance of the deuterated solvents for proton and carbon chemical shifts, and to external H<sub>3</sub>PO<sub>4</sub> (85%) for phosphorus chemical shifts. Elemental analysis was performed by Analytical Laboratory of Shanghai Institute of Organic Chemistry.

**Analysis of the mother liquor.** The dark red mother liquor was transferred to a Schlenk tube, and the solvent was removed in vacuo. The dark red residue was dissolved in 1.5 mL of C<sub>6</sub>D<sub>6</sub>, and the solution was filtered through a short silica gel column. <sup>1</sup>H NMR and <sup>31</sup>P NMR spectra of the solution were recorded, and (2,6-*i*Pr<sub>2</sub>)-C<sub>6</sub>H<sub>3</sub>P(SiMe<sub>3</sub>)<sub>2</sub> was detected. <sup>1</sup>H NMR (300 MHz, C<sub>6</sub>D<sub>6</sub>, 25 °C): δ 7.06-7.14 (m, 3H, Ph-*H*), 4.29 (m,

2H,  $CHMe_2$ ), 1.26 (d,  $^3J_{H-H} = 6.6$  Hz, 12H,  $CHMe_2$ ) and 0.29 (d,  $^3J_{P-H} = 6.2$  Hz, 18H,  $SiMe_3$ ).  $^{31}P$  NMR (120 MHz,  $C_6D_6$ , 25 °C):  $\delta$  -168 ppm. This product was further proved by compared to that prepared from the reaction of  $K[(2,6-^iPr_2)-C_6H_3P(SiMe_3)]$  with  $Me_3SiI$ .

**Reaction of (1) with benzophenone.** Benzophenone (11.1 mg, 0.06 mmol) and **1** (41.5 mg, 0.03 mmol) were mixed in 6 mL of toluene, the reaction solution became pale yellow immediately. The reaction mixture was stirred for 2 h at room temperature, and some precipitates formed. The reaction mixture was filtered, and evaporation of the solution in vacuo afforded a solid residue. The solid residue was extracted with hexane. Evaporation of the hexane solution gave a pale yellow solid. NMR study showed it was  $(Ph_2C=)P(C_6H_2-2,6-^iPr_2)$  in high purity (19.5 mg, 90% yield).  $^1H$  NMR (300 MHz,  $CDCl_3$ , 25 °C)  $\delta$  7.73-7.71 (m, 2H, m- $Ar_{dip}-H$ ), 7.52-7.50 (m, 3H, o- $Ar-H$ ), 7.39 (t,  $^3J_{HH} = 7.65$  Hz, 1H, p- $Ar_{dip}-H$ ), 7.23-7.15 (m, 4H, m- $Ar-H$ ; 1H, o- $Ar-H$ ), 7.06-7.03 (m, 2H, p- $Ar-H$ ), 3.61 (m, 2H,  $CHMe_2$ ), 1.35 (d,  $^5J_{PH} = 6.9$  Hz, 6H,  $CHMe_2$ ), 1.17 (d,  $^5J_{PH} = 6.6$  Hz, 6H,  $CHMe_2$ ).  $^{13}C$  NMR (75 MHz,  $CDCl_3$ , 25 °C)  $\delta$  191.5 (d,  $^1J_{PC} = 43.2$  Hz,  $P=C$ ), 151.1 (d,  $^2J_{PC} = 5.4$  Hz, o- $Ar_{dip}$ ), 144.6 (d,  $^2J_{PC} = 25.5$  Hz, ipso- $Ar$ ), 142.6 (d,  $^2J_{PC} = 14.6$  Hz, ipso- $Ar$ ), 137.4 (d,  $^1J_{PC} = 44.3$  Hz, ipso- $Ar_{dip}$ ), 129.4 (s,  $Ar_{dip}$  or  $Ar$ ), 129.0 (d,  $^3J_{PC} = 6.9$  Hz, o- $Ar$ ), 128.7 (d,  $^3J_{PC} = 4.2$  Hz, o- $Ar$ ), 128.2, 127.9, 127.6, 127.3 and 122.7 (s,  $Ar_{dip}$  or  $Ar$ ), 33.1 (d,  $^3J_{CP} = 8.6$  Hz,  $CHMe_2$ ), 25.1 (s,  $CHMe_2$ ),

22.5 (s, CHMe<sub>2</sub>). <sup>31</sup>P NMR (120 MHz, CDCl<sub>3</sub>, 25 °C) δ 234.9.

**X-ray Crystallography.** Suitable single crystals of **1** were sealed in thin-walled glass capillaries, and data collection was performed at 20 °C on a Bruker SMART diffractometer with graphite-monochromated Mo K $\alpha$  radiation ( $\lambda = 0.71073$  Å). The SMART program package was used to determine the unit-cell parameters. The absorption correction was applied using SADABS. The structures were solved by direct methods and refined on  $F^2$  by full-matrix least squares techniques with anisotropic thermal parameters for non-hydrogen atoms. Hydrogen atoms were placed at calculated positions and were included in the structure calculation without further refinement of the parameters. All calculations were carried out using the SHELXS-97 program. The software used is listed in the references 3-7.

### References:

1. K. Izod, S. T. Liddle and W. Clegg, *Inorg. Chem.*, 2004, **43**, 214.
2. R. T. Boéré, and J. D. Masuda, *Can. J. Chem.*, 2002, **80**, 1607.
3. G. M. Sheldrick, *SADABS*, An Empirical Absorption Correction Program for Area Detector Data. University of Goettingen, Germany, 1996.
4. G. M. Sheldrick, *SHELXS-97*, University of Goettingen, Germany, 1997.
5. *SMART* Version 5.628, Bruker Asx Inc.
6. *SAINTE* + Version 6.22a, Bruker Axs Inc.
7. *SHELXTL* NT/2000, Version 6.1.
